# Supplementary material for: Highly Efficient Photocatalysis by Zinc Oxide-Reduced Graphene Oxide (ZnO-rGO) Composite Synthesized via One-Pot Room-Temperature Chemical Deposition Method
Source: Hindawi journal article supplement (doi:10.1155/2019/1895043), 2019-12-24
Supplement: f1 [file 1895043.f1.pdf]

## SUPPLEMENTARY FILE

# Highly efficient photocatalysis by zinc oxide-reduced graphene oxide (ZnO-rGO) composite synthesized via one-pot room-temperature chemical deposition method

Roselle T. Ngalay<sup>1</sup>, Aixeen M. Fontanilla<sup>1</sup>, Ma. Rebecca S. Soriano<sup>1</sup>, Chelo S. Pascua<sup>1</sup>, Yoshitaka Matsushita<sup>2</sup> and Ian Jasper A. Agulo<sup>1</sup>

<sup>1</sup>Micro and Nano Innovations Laboratory, Department of Physical Sciences, College of Science, University of the Philippines Baguio, Baguio City 2600, Philippines.

<sup>2</sup>Materials Analysis Station, National Institute for Materials Science, Sengen, Tsukuba, Ibaraki, 305-0047, Japan.

Correspondence should be addressed to Roselle T. Ngalay; [rtngalay@up.edu.ph](mailto:rtngalay@up.edu.ph)

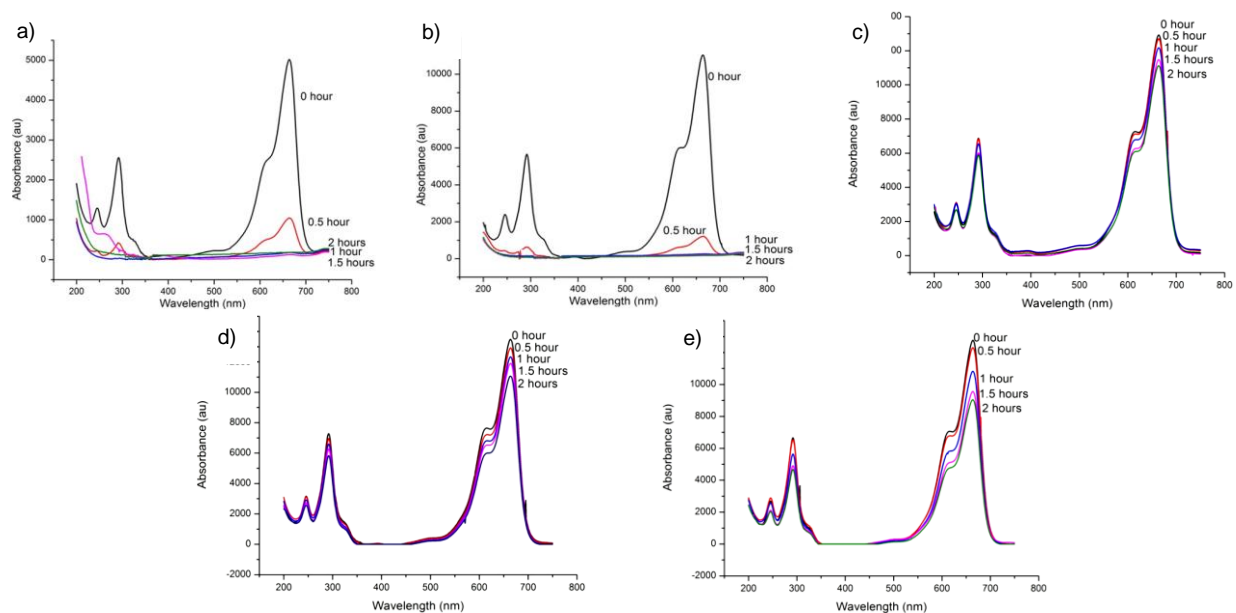

**Figure 1S.** Absorbance spectra of MB using a) ZG1, b) ZG2, c) ZG3, d) ZG4, and e) ZG5 for different UV irradiation time intervals.

## SUPPLEMENTARY FILE

**Table 1S** Photocatalytic rate constant ( $k$ ) of ZnO and ZnO-reduced Graphene oxide composites on photodegradation of Methylene Blue (MB)

| Catalyst | Photocatalytic rate constant ( $k$ ) |
|----------|--------------------------------------|
| ZG1      | $0.1109 \text{ min}^{-1}$            |
| ZG2      | $0.1253 \text{ min}^{-1}$            |
| ZG3      | $0.0027 \text{ min}^{-1}$            |
| ZG4      | $0.0032 \text{ min}^{-1}$            |
| ZG5      | $0.0063 \text{ min}^{-1}$            |
| ZnO      | $0.0683 \text{ min}^{-1}$            |

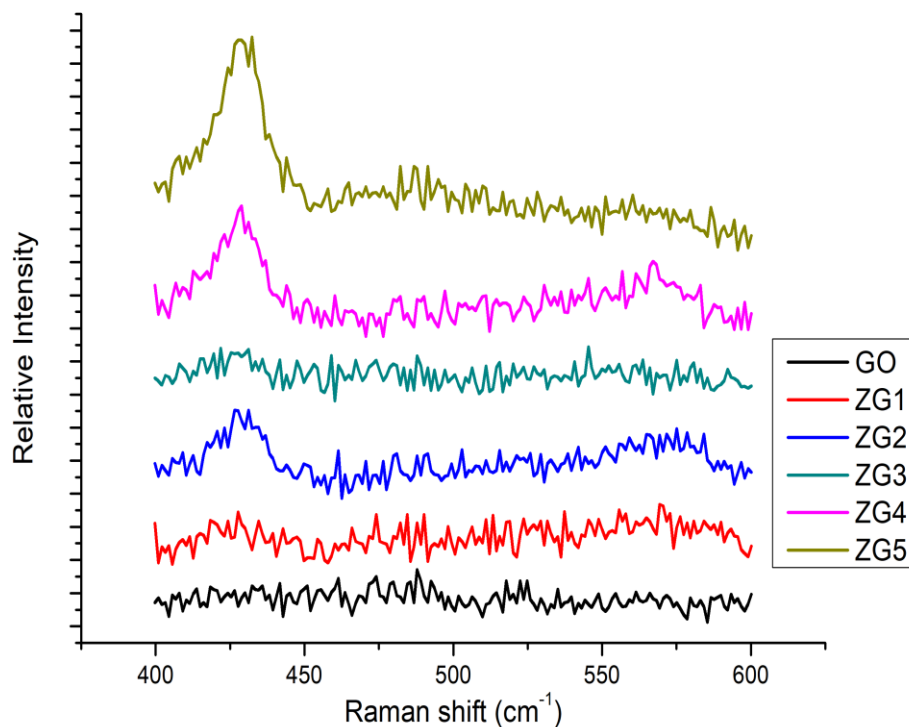

**Figure 2S.** Raman spectroscopy measurements of samples GO, ZG2, ZG3, ZG4 and ZG5 for the range corresponding to ZnO vibrational modes
